# Supplementary material
Source: Elsevier journal article supplement (https://addi.ehu.es/bitstream/handle/10810/20603/mmc2.docx?isAllowed=n)
Supplement: mmc2 [file mmc2.docx]

**Information about the data sets:**

*Sheet 1 (EX1_RS6):* Each line provides data for one subject. The first column codes whether the stimulus set was based on the fricative-heavy words or on the stop-heavy words. The remaining columns specify whether the target item was a word or its nonword version (w, nw) and the duration of each time-reversed segment (10, 30, 50, 70, 90, or 110 ms).

*Sheet 2 (EX2_RS4):* Each line provides data for one subject. Each column specifies whether the target item was a word or its nonword version (w, nw) and the duration of each time-reversed segment (20, 40, 60, or 80 ms). The final three columns were used to compute the “lexical effect” for the correlation analyses.

*Sheet 3 (EX2_PR):* Each line provides data for one subject. Each column specifies whether the target item was a word or its nonword version (w, nw) and whether the target was presented in intact form with noise added (A) or with one segment replaced by noise (R). The final three columns were used to compute the “lexical effect” for the correlation analyses.

*Sheet 4 (CORREL):* Each line provides data for one subject. Each column specifies the “lexical effect” for either reversed speech (RS4) or for phonemic restoration (PR). Note that the reported sign of the correlation (positive or negative) depends on whether one looks at the “lexical effect” or at accuracy of performance on the restoration task, because a stronger lexical effect produces lower accuracy (i.e., a smaller spread between the Added and Replaced ratings).
